# Supplementary material for: Immune Dysregulation after Cardiothoracic Surgery and Incidental Thymectomy: Maintenance of Regulatory T Cells despite Impaired Thymopoiesis
Source: Hindawi journal article supplement (doi:10.1155/2011/915864), 2011-01-01
Supplement: f1 [file 915864.f1.pdf]

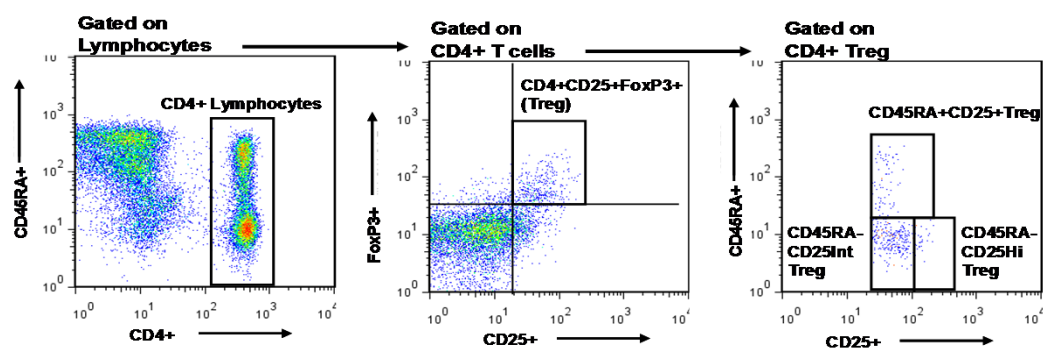

**Supplemental Figure: Gating strategy for Treg.** Flow cytometry dot plots and pseudodot plot are shown. Cells gated on CD4+ lymphocytes are then gated on CD25+ and FoxP3+ to quantify Treg. CD45RA+ and CD45RA- populations were quantified among Treg. Treg expressing the highest levels of CD25 include the CD45RA- cells while CD45RA+ Treg express intermediate levels of CD25.
